# Supplementary material for: Plant-Based Innovations for the Transition to Sustainability: A Bibliometric and in-Depth Content Analysis
Source: MDPI journal article supplement (doi:10.3390/foods11193137), 2022-10-09
Supplement: s1 [file s1]

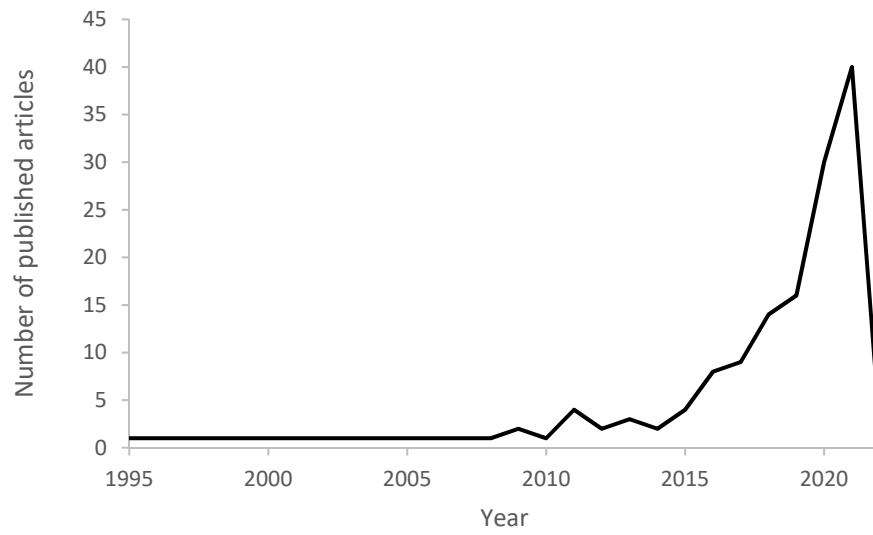

**Figure S1.** All published articles from 1995 to 2022 (up to January).

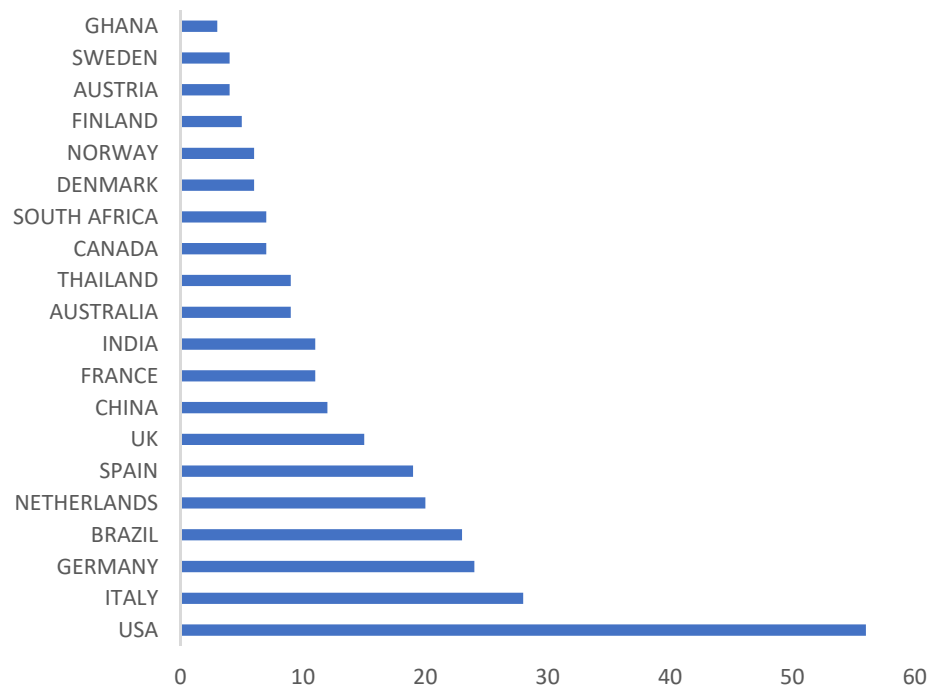

**Figure S2.** Distribution of published articles by countries/regions (a minimum of three publications);

A

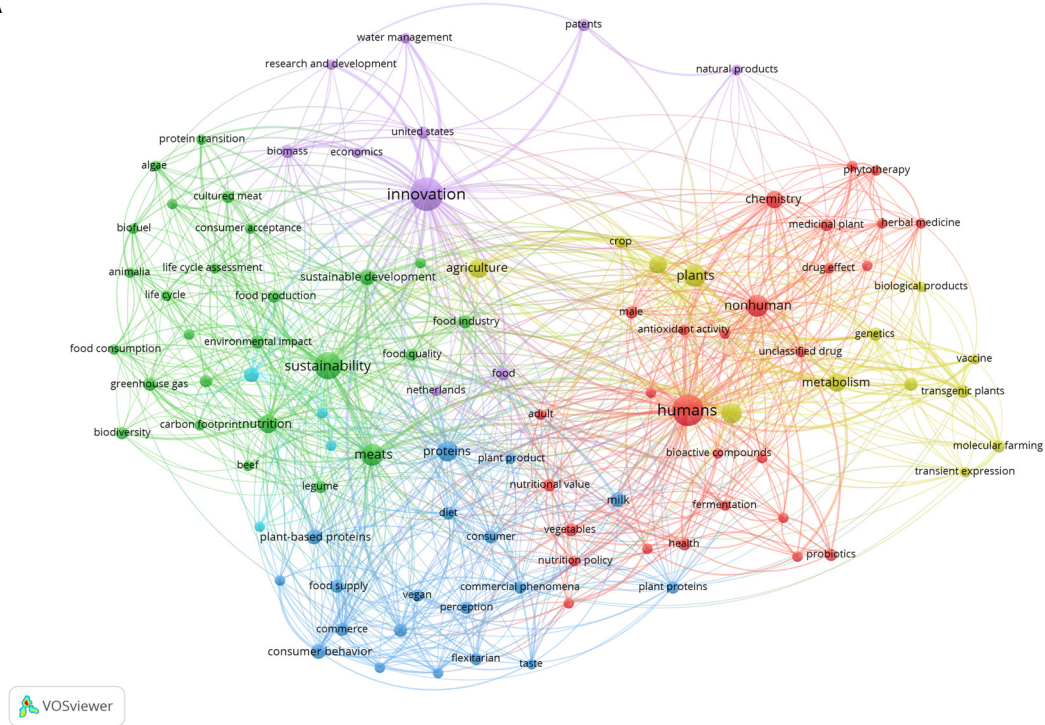

B

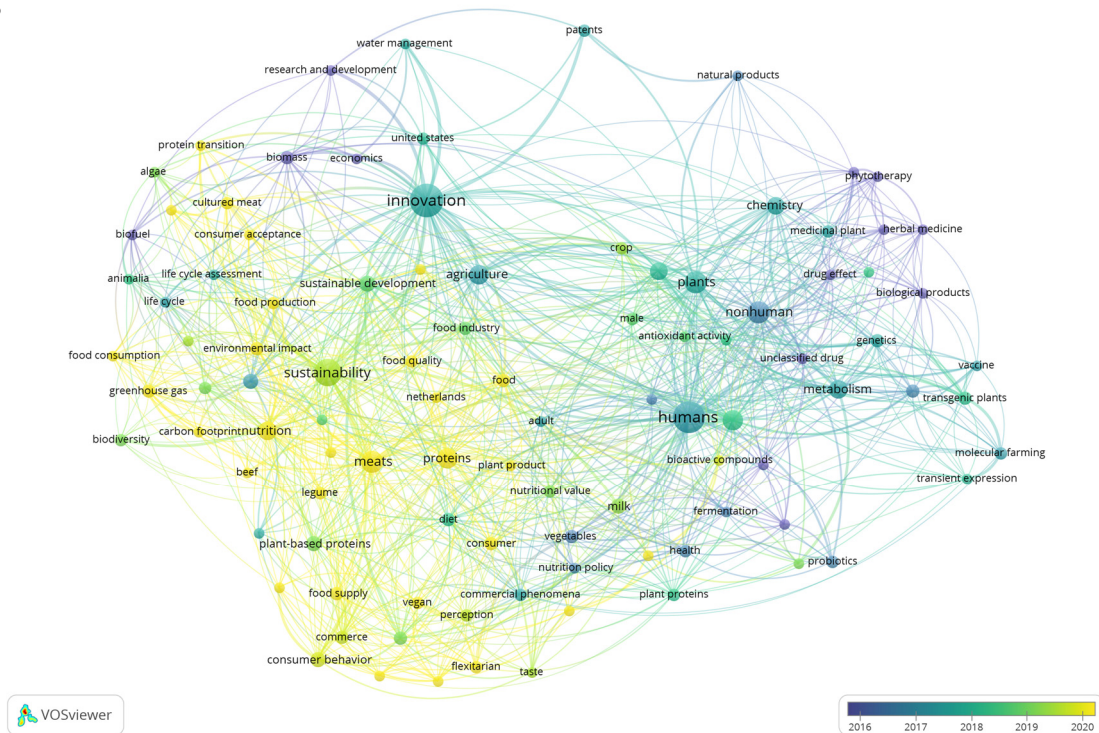

**Figure S3.** Bibliometric analysis of themes. **(A)** Distribution of the themes. **(B)** Network map of the trend topics according to the keywords used from 2015 to 2021.

**Table S1. The impacts of top journals: summary**

| <b>Source</b>                                               | <b>Documents</b> | <b>Citations</b> | <b>Average<br/>publication year</b> |
|-------------------------------------------------------------|------------------|------------------|-------------------------------------|
| Trends in Food Science & Technology                         | 7                | 227              | 2020                                |
| Sustainability                                              | 6                | 46               | 2019                                |
| Appetite                                                    | 3                | 36               | 2018                                |
| Environmental Innovation and Societal Transitions           | 3                | 97               | 2019                                |
| Food Quality and Preference                                 | 3                | 40               | 2019                                |
| Foods                                                       | 3                | 16               | 2020                                |
| Applied Energy                                              | 2                | 37               | 2014                                |
| Critical Reviews in Food Science And Nutrition              | 2                | 119              | 2012                                |
| Current Opinion in Biotechnology                            | 2                | 25               | 2020                                |
| Environmental Communication-a Journal of Nature And Culture | 2                | 20               | 2020                                |
| Frontiers in Plant Science                                  | 2                | 21               | 2018                                |
| International Journal of Food Design                        | 2                | 4                | 2020                                |
| Journal of Cleaner Production                               | 2                | 5                | 2020                                |
| Journal of Dairy Science                                    | 2                | 72               | 2017                                |
| Journal of Environmental Management                         | 2                | 14               | 2016                                |
| Meat Science                                                | 2                | 1                | 2021                                |
| Molecular Biotechnology                                     | 2                | 44               | 2015                                |
| Scientific Reports                                          | 2                | 14               | 2016                                |
| Public Health Nutrition                                     | 1                | 746              | 2011                                |
| International Journal of Molecular Sciences                 | 1                | 301              | 2018                                |
| Current Pharmaceutical Design                               | 1                | 81               | 2013                                |
| Molecular Biology and Evolution                             | 1                | 78               | 2008                                |

**Table S2. Articles with high scores related to citations**

| <b>Paper</b>                                | <b>Total Citations</b> | <b>Total citation per Year</b> | <b>Normalized total citation</b> |
|---------------------------------------------|------------------------|--------------------------------|----------------------------------|
| Thomford N, 2018, Int J Mol Sci             | 301                    | 60.2                           | 9.892                            |
| Galanakis C, 2021, Trends Food Sci Tech     | 39                     | 19.5                           | 8.8136                           |
| Aschemann-Witzel J, 2021, Crit Rev Food Sci | 37                     | 18.5                           | 8.3616                           |
| Onwezen M, 2021, Appetite                   | 24                     | 12                             | 5.4237                           |
| Bhargava N, 2020, Trends Food Sci Tech      | 54                     | 18                             | 5.0784                           |
| McCarthy K, 2017, J Dairy Sci               | 72                     | 12                             | 4.9466                           |
| Bach-Faig A, 2011, Public Health Nutr       | 746                    | 62.167                         | 4.0                              |
| Van Der Weele C, 2019, Trends Food Sci Tech | 73                     | 18.25                          | 3.8548                           |
| Nayak L, 2016, Fash Text                    | 32                     | 4.571                          | 3.5068                           |
| Sha L, 2020, Trends Food Sci Tech           | 36                     | 12                             | 3.3856                           |
| Tziva M, 2020, Environ Innov Soc Trans      | 30                     | 10                             | 2.8213                           |
| Curtain F, 2019, Nutrients                  | 45                     | 11.25                          | 2.3762                           |
| Estell M, 2021, Sustainability-Basel        | 10                     | 5                              | 2.2599                           |
| Rosales-Mendoza S, 2015, Mol Biotechnol     | 27                     | 3.375                          | 2.0769                           |
| Aschemann-Witzel J, 2019, Food Qual Prefer  | 36                     | 9                              | 1.901                            |
| Gupta S, 2012, Crit Rev Food Sci            | 82                     | 7.455                          | 1.8427                           |
